# Supplementary material for: Cellular Membrane Accommodation to Thermal Oscillations in the Coral Seriatopora caliendrum
Source: PLoS One. 2014 Aug 20;9(8):e105345. doi: 10.1371/journal.pone.0105345 (PMC4139334; doi:10.1371/journal.pone.0105345)
Supplement: Table S1 — The percentage of glycerophosphocholine species detected in the coral ( Seriatopora caliendrum ). (XLS) [file pone.0105345.s004.xls]

## Sheet: raw data
Table S1 The percentage of glycerophosphocholine species detected in the coral (Seriatopora caliendrum)
Sample \ Lipid	PC(O-14:0/0:0)	PC(0:0/14:0)	PC(14:0/0:0)	PC(O-15:0/0:0)	PC(O-16:1/0:0)	PC(O-16:0/0:0)	PC(0:0/16:1)	PC(16:1/0:0)	PC(0:0/16:0)	PC(16:0/0:0)	PC(O-17:0/0:0)	PC(O-18:1/0:0)	PC(17:0/0:0)	PC(O-18:0/0:0)	PC(0:0/18:3)	PC(18:3/0:0)	PC(0:0/18:2)	PC(18:2/0:0)	PC(0:0/18:1)	PC(18:1/0:0)	PC(0:0/18:0)	PC(18:0/0:0)	PC(O-19:0/0:0)	PC(19:0/0:0)	m/z540@2.27	PC(0:0/20:5)	PC(20:5/0:0)	PC(20:4/0:0)	PC(0:0/20:3)	PC(20:3/0:0)	PC(0:0/20:1)	PC(20:1/0:0)	PC(0:0/20:0)	PC(20:0/0:0)	PC(21:6/0:0)	PC(0:0/22:6)	PC(22:6/0:0)	m/z568@2.48	PC(22:5/0:0)+PC(0:0/22:5)	PC(0:0/22:4)+PC(22:4/0:0)	PC(0:0/22:3)	PC(22:3/0:0)	m/z578@2.13	PC(0:0/22:0)	PC(23:6/0:0)	PC(0:0/24:6)+PC(24:6/0:0)	PC(0:0/24:5)+PC(24:5/0:0)	PC(O-25:0/0:0)	PC(0:0/26:5)+PC(26:5/0:0)
Tip position tissue
HBH 1	0.0139109	0.00273189	0.0335657	0.0110007	0.641249	1.11065	0.0178074	0.00938023	0.174509	2.80524	0.0635286	0.0130113	0.0851275	1.05011	0.06247	0.0349557	0.0742228	0.0216145	0.0924494	0.0989243	0.0781021	1.834	0.0241856	0.0276214	0.00792336	0.18668	0.0559428	0.242184	0.123836	0.0335651	0.00716552	0.0111306	0.00939792	0.101629	0.0504045	1.90424	0.74715	0.0490743	0.642318	0.341834	0.0478913	0.0128401	0.322574	0.0032264	0.0240659	0.0809234	0.0602318	0.00295746	0.0592816
HBH 2	0.0114232	0.00251742	0.0124518	0.00392592	0.2423	0.700453	0.00694187	0.0034831	0.129986	1.32342	0.0338387	0.00469255	0.053558	0.422047	0.0212247	0.00498278	0.0109662	0.00822041	0.0100114	0.0306177	0.0725476	1.04383	0.00998312	0.0115804	0.00509589	0.0799505	0.032218	0.0885215	0.0322828	0.0104507	0.00240044	0.00177045	0.0030494	0.0303822	0.0412336	0.524898	0.294638	0.01373	0.289506	0.109795	0.0138014	0.0045628	0.12359	0.00499456	0.0067504	0.0278943	0.0195339	0.00250665	0.00737621
HBH 3	0.00833058	0.000901095	0.00320896	0.00114473	0.0949975	0.717398	0.00209554	0.00217117	0.0180059	0.360248	0.0114492	0.0064384	0.0158136	0.323613	0.00627176	0.00527941	0.0137102	0.00301704	0.00822477	0.0143092	0.0153563	0.394516	0.00531341	0.00373638	0.00141754	0.0190703	0.0171017	0.0581199	0.0134467	0.00380668	0.000323197	0.000781146	0.000652048	0.0176086	0.00794165	0.251606	0.0561647	0.00803566	0.0617917	0.0315069	0.00247919	0.000960143	0.017295	0.00209194	0.0025298	0.0053395	0.0043339	0.00476528	0.00517251
HBH 4	0.0130737	0.00419937	0.0231011	0.00480015	0.429669	1.0139	0.0101736	0.00657924	0.206775	1.84637	0.0542801	0.011451	0.0434529	0.755766	0.0345242	0.0156402	0.0185578	0.0114386	0.040878	0.072022	0.0645692	1.12024	0.0249206	0.0174606	0.0065096	0.111992	0.0437808	0.143336	0.0501676	0.019861	0.00641409	0.00890237	0.00347946	0.0553226	0.0380334	0.760414	0.395059	0.0290399	0.420866	0.172078	0.0207676	0.00688764	0.172985	0.00457816	0.00831974	0.0344865	0.0423105	0.00442687	0.0195123
HBH 5	0.013966	0.00297376	0.0464867	0.00789681	0.557782	1.23962	0.006299	0.00604926	0.270723	3.09088	0.0834311	0.0130538	0.0709783	1.25136	0.0305014	0.0172561	0.0171538	0.0100102	0.0235662	0.0906724	0.141214	1.93057	0.0197	0.0214395	0.00831571	0.0738646	0.028924	0.140298	0.0742868	0.0235127	0.00485785	0.0190721	0.00765573	0.0887343	0.0654668	0.79489	0.488515	0.0600558	0.328774	0.221712	0.0267396	0.00867648	0.210457	0.00557695	0.0215655	0.0343567	0.0307101	0.0075962	0.0170313
HBH 6	0.0114214	0.00194448	0.0266062	0.00386684	0.431684	0.836247	0.0145707	0.00421037	0.0856703	1.44132	0.0379264	0.00799672	0.0305415	0.656327	0.0149702	0.00570635	0.0209336	0.0105388	0.0209936	0.0582473	0.0505171	0.869204	0.0176888	0.0119196	0.00291321	0.0974667	0.0324773	0.102742	0.0401931	0.0178889	0.00129495	0.00630857	0.00427611	0.0541768	0.0258256	0.749676	0.295374	0.0290945	0.177178	0.126369	0.00729111	0.00414522	0.0776832	0.00409493	0.00686397	0.0176238	0.0190264	0.003729	0.0126717
HBH 7	0.0100908	0.00692365	0.0382493	0.00307915	0.497934	0.99045	0.0219515	0.00315953	0.234113	2.34537	0.0511717	0.00983175	0.0499763	0.959895	0.0297734	0.0121851	0.0176024	0.00982027	0.0229915	0.0614311	0.0947301	1.17571	0.0252726	0.0182664	0.00706552	0.0608267	0.0230342	0.0988954	0.0346218	0.0136738	0.00136101	0.00534106	0.00467523	0.0525681	0.0535574	0.592032	0.425153	0.0409795	0.234695	0.137489	0.0117065	0.00627184	0.138041	0.00617465	0.0103834	0.0181239	0.0169801	0.00544008	0.0157173
HBH 8	0.0133826	0.00306686	0.0346062	0.00786106	0.507509	1.14541	0.0113407	0.00472962	0.133578	2.46156	0.0607946	0.0102129	0.0636461	1.13405	0.0536775	0.0481639	0.0348515	0.0100338	0.0514097	0.0859536	0.0518684	1.74308	0.0165585	0.0284069	0.00932094	0.188581	0.0895381	0.174504	0.0870241	0.0160181	0.00276995	0.00965766	0.00627658	0.117201	0.0558402	1.83224	0.55026	0.0368171	0.88535	0.263479	0.0448584	0.00663156	0.225643	0.00646656	0.0210356	0.0829141	0.0517484	0.00371696	0.0588993
SSJ 1	0.00774879	0.00139112	0.0269804	0.00290762	0.384351	0.852514	0.0158786	0.00478511	0.117888	1.699	0.0402036	0.00796782	0.0543127	0.65928	0.0764744	0.0135283	0.0319297	0.0100706	0.0408403	0.0505814	0.0634172	0.942751	0.00833711	0.0150562	0.0038147	0.158743	0.0359975	0.225288	0.0945891	0.0280319	0.00575381	0.00484292	0.00544165	0.0588952	0.024473	0.962422	0.381918	0.0251335	0.376626	0.193319	0.0303496	0.00496955	0.139514	0.00535629	0.00652209	0.0320277	0.0366509	0.00260387	0.0142363
SSJ 2	0.00497762	0.00475034	0.0149541	0.00236518	0.164174	0.569753	0.00315079	0.00149147	0.0663106	1.10128	0.0313335	0.00673639	0.0277048	0.435269	0.033128	0.0163603	0.0269515	0.00811812	0.0365216	0.0374576	0.0384291	0.665907	0.00947034	0.00882262	0.00233534	0.126972	0.0261908	0.17925	0.073385	0.0241098	0.00332206	0.00452554	0.00410794	0.0315889	0.0181029	0.635876	0.259807	0.0142398	0.27254	0.157374	0.0160905	0.00530664	0.0838986	0.00493175	0.00384493	0.0246044	0.0269731	0.00705628	0.0164332
SSJ 3	0.00492087	0.000689762	0.00650284	0.0018399	0.166716	0.407862	0.00189235	0.00284981	0.0632143	0.841304	0.0314918	0.00332459	0.030342	0.332265	0.0153667	0.0158384	0.0244258	0.0116187	0.0187987	0.0232425	0.0300529	0.599109	0.00820977	0.0067433	0.000974656	0.0593453	0.0158378	0.124079	0.0407856	0.0115303	0.00192188	0.00209109	0.00129792	0.0270189	0.0148194	0.455936	0.106476	0.0134566	0.127132	0.066802	0.00726095	0.00196206	0.0578608	0.00521158	0.00408823	0.0116704	0.0114299	0.00263852	0.00361654
SSJ 4	0.0156203	0.00154731	0.0144379	0.00222935	0.515471	0.880185	0.00359302	0.00525832	0.091446	1.37682	0.0487435	0.00689705	0.0319425	0.533672	0.0370453	0.0141552	0.0459658	0.015345	0.0352491	0.0415642	0.0430979	0.994046	0.0116305	0.0137934	0.00364892	0.128869	0.0291198	0.274297	0.0924727	0.0350651	0.00372541	0.00604025	0.00403343	0.0549405	0.0296996	1.103	0.412746	0.0172929	0.317739	0.246684	0.0206787	0.00632007	0.123422	0.00549203	0.0132158	0.0256349	0.0463723	0.00122002	0.0244293
SSJ 5	0.00604247	0.000965119	0.00899359	0.000533454	0.269711	0.453216	0.00492479	0.00232051	0.0384499	0.78863	0.0275224	0.00163082	0.0212703	0.369113	0.0234417	0.00692757	0.0162705	0.00837683	0.0166516	0.026667	0.0290781	0.557441	0.00632029	0.00869743	0.00227259	0.0556255	0.0077578	0.102381	0.045663	0.0163151	0.00384977	0.0029135	0.0155939	0.0315979	0.0130553	0.500683	0.123376	0.0136637	0.133854	0.0837542	0.00521276	0.0043528	0.0471142	0.00545441	0.00283378	0.0124756	0.0129287	0.00245393	0.00894458
SSJ 6	0.00960608	0.00124454	0.0290782	0.00179719	0.409159	0.743182	0.0127228	0.00711421	0.121185	1.44087	0.0436723	0.00827239	0.0462992	0.703425	0.0309543	0.00706738	0.0266873	0.00407183	0.0152304	0.0365371	0.0529749	1.05222	0.0117619	0.0157715	0.00389312	0.091242	0.0443964	0.180171	0.0684242	0.0150294	0.00263475	0.00593964	0.00469438	0.0625317	0.0292549	0.781151	0.225778	0.0235921	0.236329	0.105861	0.012405	0.00139137	0.0754434	0.00630525	0.00906862	0.0187821	0.0260748	0.00333255	0.01223
SSJ 7	0.0110233	0.00486384	0.0323541	0.00595268	0.436868	1.07866	0.0212843	0.00361988	0.206705	2.27586	0.0580373	0.00928846	0.090504	0.608383	0.0788086	0.026139	0.088751	0.0215656	0.0811806	0.094611	0.0949663	1.51162	0.0117532	0.0215121	0.00371431	0.378551	0.167117	0.573069	0.22888	0.0660165	0.00634329	0.0119978	0.00531493	0.0723611	0.0480594	1.90233	0.848126	0.0188773	0.709108	0.439026	0.0508481	0.0146231	0.311017	0.00478347	0.0177038	0.0699536	0.105153	0.00265602	0.0486757
Stalk position tissue
HBH 1	0.0074013	0.00305282	0.0147238	0.00331833	0.308345	0.757513	0.00377535	0.00691918	0.148928	1.39617	0.0438952	0.00773533	0.0401907	0.5785	0.026301	0.0147324	0.0178194	0.0187396	0.0475309	0.056972	0.0624423	0.804735	0.00796762	0.0145981	0.00349764	0.0682398	0.0344902	0.134997	0.038907	0.0208729	0.00221134	0.00859591	0.0054128	0.0501599	0.0217679	0.654368	0.358445	0.0214067	0.322035	0.127004	0.018099	0.00834868	0.154834	0.00211956	0.0108081	0.0290319	0.0213458	0.00322459	0.0105258
HBH 2	0.00612029	0.000280322	0.00991708	0.00262637	0.171705	0.543442	0.001685	0.00177937	0.094779	1.07077	0.029257	0.00235628	0.0372109	0.335901	0.0100018	0.00816496	0.0111469	0.00527185	0.00949462	0.0182541	0.052333	0.635886	0.00422049	0.0088598	0.00341096	0.0490552	0.0153648	0.0575682	0.0138859	0.0118729	0.00112083	0.00135895	0.00235371	0.016115	0.024575	0.394934	0.146681	0.00902988	0.157053	0.0685698	0.00854482	0.00246243	0.0589439	0.00683052	0.00399823	0.0190548	0.0160401	0.00308605	0.00434833
HBH 3	0.00229664	0.000461285	0.00553219	0.00131974	0.110746	0.365904	0.00458613	0.00224807	0.0456806	0.592518	0.016777	0.00228709	0.015153	0.312298	0.0117498	0.00510443	0.0159492	0.00605739	0.0127985	0.027469	0.0252079	0.38652	0.00704852	0.00455677	0.00188725	0.0473926	0.0174244	0.0651159	0.022923	0.0112586	0.00121485	0.00147134	0.00173249	0.0193473	0.00881868	0.244915	0.109106	0.00959287	0.110208	0.042895	0.00551698	0.00203847	0.0455085	0.0033513	0.00252683	0.00723981	0.00663292	0.00151175	0.00285484
HBH 4	0.0035491	0.0018273	0.00898664	0.00181187	0.162446	0.460712	0.00446573	0.00268796	0.0694261	0.746463	0.0174297	0.00451594	0.0218846	0.28939	0.00809244	0.00239701	0.00565967	0.00330674	0.0186159	0.0330961	0.0299308	0.388318	0.00780657	0.00455131	0.00300502	0.0383429	0.0105202	0.0623043	0.0141766	0.0081655	0.000849866	0.00429594	0.000940258	0.0177478	0.00800678	0.274748	0.110461	0.00766805	0.146935	0.0592618	0.00495324	0.00317856	0.0511934	0.00395303	0.00417352	0.00782072	0.00828635	0.00294349	0.00400884
HBH 5	0.0100983	0.00543621	0.0268972	0.00361459	0.358715	1.3436	0.0123951	0.00626179	0.269853	2.79469	0.0719425	0.00671887	0.064314	0.862824	0.0254218	0.0105839	0.00770806	0.00862036	0.0250104	0.0781696	0.103161	1.46477	0.0171031	0.024479	0.00399694	0.0546939	0.0440365	0.0873741	0.035246	0.0201412	0.00859641	0.0104566	0.00627294	0.055078	0.0497071	0.411564	0.282736	0.0330077	0.241484	0.0917718	0.00987338	0.00610216	0.0990609	0.00318465	0.012673	0.0201193	0.0194556	0.00160524	0.0054562
HBH 6	0.003618	0.00111401	0.00904665	0.00277434	0.260676	0.529789	0.00571307	0.0021043	0.0653377	0.830187	0.0289511	0.00551583	0.0238318	0.458376	0.00854442	0.00328002	0.00444519	0.00491269	0.013899	0.0392156	0.0392373	0.661581	0.00422653	0.00770169	0.000758889	0.0347118	0.0137651	0.0745197	0.019972	0.00737211	0.00212419	0.00159575	0.00440692	0.0282227	0.0155651	0.268829	0.197521	0.0136378	0.0995024	0.0523271	0.00471741	0.00175612	0.0698656	0.00499588	0.0045154	0.00902475	0.00970757	0.00400138	0.0044195
HBH 7	0.0047819	0.00207175	0.0545867	0.00163895	0.348318	0.943845	0.0149653	0.0059055	0.274752	2.94401	0.0496949	0.00575787	0.0703449	0.947471	0.0138233	0.00974833	0.00816382	0.00619786	0.0197143	0.0811194	0.101696	1.27076	0.0223603	0.0218639	0.00293354	0.0458077	0.0231571	0.0858833	0.023406	0.0222037	0.00270303	0.00729339	0.008088	0.0553963	0.04665	0.457364	0.299228	0.0393097	0.182766	0.104079	0.00944227	0.00505317	0.130577	0.00324301	0.0122653	0.0166157	0.0174231	0.00254037	0.0060423
HBH 8	0.00845277	0.00283433	0.0236417	0.00415741	0.281224	1.02668	0.013439	0.00967193	0.219156	2.08995	0.0533349	0.0075145	0.0519197	0.697549	0.0232018	0.0203109	0.017714	0.0117892	0.0384346	0.0752623	0.0836574	1.34213	0.0150844	0.0129319	0.00384121	0.102596	0.0903139	0.139016	0.0457655	0.0278137	0.00199623	0.0072128	0.00311742	0.0496738	0.0480201	0.841501	0.805737	0.0190644	0.610732	0.185237	0.0236588	0.0157545	0.264483	0.00338798	0.0121887	0.043899	0.0295549	0.00132952	0.0243997
SSJ 1	0.00757848	0.00435441	0.0266614	0.00238432	0.234022	0.611568	0.00812872	0.00616993	0.182253	1.51172	0.0398619	0.00501134	0.0579725	0.48836	0.0159264	0.0143775	0.0105849	0.00928062	0.0263808	0.0388825	0.0746475	0.852298	0.00654937	0.0121343	0.00337142	0.10185	0.0643074	0.132408	0.0507809	0.022328	0.00512245	0.00545266	0.00375819	0.0388806	0.030343	0.402197	0.281607	0.0175929	0.232329	0.0974651	0.0151662	0.00424904	0.0894827	0.00458347	0.00529969	0.0134728	0.0130636	0.00231755	0.0027536
SSJ 2	0.00416698	0.0046919	0.0269904	0.00278771	0.147349	0.603022	0.00507662	0.00440973	0.151038	1.4423	0.0232773	0.00613584	0.029451	0.37355	0.0262577	0.019768	0.0190702	0.0111239	0.0532511	0.0600767	0.0590059	0.698654	0.00928693	0.00981235	0.00355878	0.0854729	0.0621256	0.209596	0.0667916	0.043632	0.00468105	0.00589727	0.00526913	0.0275027	0.0249804	0.624389	0.36111	0.0087007	0.410931	0.217976	0.0218121	0.00557011	0.138979	0.00443217	0.00578701	0.0199263	0.0249255	0.00171094	0.0138963
SSJ 3	0.00334308	0.000867551	0.00763144	0.00225994	0.122038	0.435329	0.00187657	0.00329891	0.0886927	0.81978	0.0371559	0.00325439	0.026002	0.256913	0.0150396	0.00751979	0.0114869	0.00297636	0.0118146	0.0221094	0.0304419	0.501478	0.00196764	0.00863863	0.00218756	0.0295074	0.00799582	0.0490133	0.022892	0.00789936	0.00114737	0.00299217	0.00147828	0.0152101	0.0117035	0.144154	0.089959	0.00671323	0.0656335	0.0313931	0.00297943	0.000930343	0.0291627	0.00301527	0.00290228	0.00665488	0.00713096	0.00334414	0.00237596
SSJ 4	0.00724354	0.00348322	0.025707	0.00141787	0.225231	0.522528	0.00691104	0.00345424	0.0920974	1.0503	0.0218507	0.00480183	0.0230609	0.489882	0.0264674	0.0101197	0.0146187	0.00719546	0.0268352	0.0377962	0.0353408	0.592659	0.00519099	0.00626158	0.00131777	0.0610895	0.0163336	0.130934	0.0400103	0.0202365	0.00579476	0.0036163	0.00346862	0.0238104	0.0169281	0.441167	0.147892	0.0130747	0.223991	0.109381	0.0110528	0.00569775	0.0646127	0.00383654	0.00536443	0.0104428	0.0234707	0.00147827	0.004533
SSJ 5	0.00656208	0.00833296	0.0235441	0.00185292	0.292297	0.707187	0.0104685	0.0076166	0.226209	1.83499	0.0471724	0.00520885	0.0502106	0.510593	0.0414006	0.0224797	0.0134692	0.0207411	0.050856	0.0746971	0.0836229	0.88343	0.00747858	0.0193229	0.00264447	0.126986	0.102949	0.22001	0.134951	0.0591849	0.0021998	0.00766551	0.00568456	0.0513383	0.0275731	0.938195	0.630372	0.0158122	0.402685	0.282596	0.024004	0.0213444	0.207447	0.00552275	0.0105984	0.0279888	0.0421426	0.00372005	0.014453
SSJ 6	0.00463564	0.00168488	0.0193274	0.0013374	0.194319	0.453052	0.00575093	0.00204896	0.0814825	1.10994	0.0251668	0.00506433	0.0289363	0.437245	0.0115319	0.00598451	0.0112684	0.00228027	0.00688532	0.027696	0.0475038	0.521825	0.00494203	0.00681313	0.000854604	0.0258402	0.0244596	0.0740962	0.0196066	0.0104987	0.00093753	0.00429853	0.00399418	0.0366299	0.0201464	0.211124	0.128212	0.011078	0.0868025	0.0369829	0.00513315	0.00285879	0.0380927	0.00422029	0.00366611	0.0062398	0.00673577	0.00219225	0.00224702
SSJ 7	0.00422722	0.000910259	0.00837306	0.0019511	0.189812	0.517909	0.00721955	0.00357359	0.070861	0.949462	0.0257418	0.00278006	0.0382418	0.235533	0.0268447	0.00669242	0.0160654	0.00762776	0.0258631	0.0411105	0.0459485	0.563332	0.00384487	0.00356794	0.00311877	0.0576898	0.0227013	0.135553	0.0462833	0.02347	0.00198873	0.00295689	0.00179626	0.0212493	0.0141955	0.367488	0.22364	0.00747783	0.234331	0.0970243	0.00880387	0.00511476	0.0875569	0.00497769	0.00257186	0.015853	0.0196521	0.00155502	0.00357094
*Percentage is the relative signal intensity in relation to the total signal response of lipids in the coral tissue.
*The peak signals which molecular species had not been identified are indicated as “m/z@retention time”.
*HBH: Houbibu, SSJ: Siashuiku.
[truncated: 169 more columns]
